# Supplementary material for: Rac Regulates Its Effector Phospholipase Cγ2 through Interaction with a Split Pleckstrin Homology Domain
Source: PubMed Central journal article supplement — J Biol Chem. 2008 Oct 31;283(44):30351–62. doi: 10.1074/jbc.M803316200 (PMC2573054; doi:10.1074/jbc.m803316200), 2008-10-31
Supplement: M803316200_1.pdf [file M803316200_1.pdf]

**Supplemental Figure 1. Regulation of wild-type and spPH mutants of PLC $\gamma$ 1 and PLC $\gamma$ 2 by  $\Delta$ N-Vav1.**

COS-7 cells were cotransfected as indicated with empty vector (*Control*), vectors encoding wild-type Rac2 (250 ng per well),  $\Delta$ N-Vav1 (500 ng per well), and/or wild-type or mutant PLC $\gamma$  isozymes. The amounts of vectors encoding the PLC $\gamma$  isozymes were adjusted according to their basal activities shown in the left panel of Fig. 3B and Fig. 7B: PLC $\gamma$ 1-111, 300 ng per well; PLC $\gamma$ 2-222, 1000 ng per well; PLC $\gamma$ 1-122, 10 ng per well; PLC $\gamma$ 2-211, 1000 ng per well, and PLC $\gamma$ 2-F897Q, 1000 ng per well. The total amount of DNA was maintained constant at 1.75  $\mu$ g per well in each transfection by adding empty vector. *Top panel*, cells from one well were lysed in 200  $\mu$ l of SDS-PAGE sample preparation buffer. An aliquot (25  $\mu$ l) of the lysate was subjected to SDS-PAGE, and immunoblotting was performed using an antibody reactive with the c-myc epitope. In additional experiments (results not shown), it was found that PLC $\gamma$ 1-122 was in fact present, albeit at much lower levels in transfected COS-7 cells, and that  $\Delta$ N-Vav 1 was present at the same level in cells transfected with the corresponding vector.

**Supplemental Figure 2. Membrane localization of chimeric PLC $\gamma$  proteins.**

COS-7 cells were seeded on 10 cm cell culture plates ( $2 \times 10^6$  cells/plate) and transfected with 15  $\mu$ g per plate of vector encoding wild-type PLC $\gamma$ 1 (*1-111*), wild-type PLC $\gamma$ 2 (*2-222*) or the chimeric mutants PLC $\gamma$ 1-121 (*1-121*), PLC $\gamma$ 1-112 (*1-112*), PLC $\gamma$ 1-122 (*1-122*), PLC $\gamma$ 2-212 (*2-212*), PLC $\gamma$ 2-221 (*2-221*), or PLC $\gamma$ 2-211 (*2-211*). All PLC $\gamma$  polypeptides contain a c-myc epitope tag at their carboxyl terminus. Forty-eight hours after transfection, the cells were harvested, homogenized, and fractionated into postnuclear soluble (*S*) and particulate (*P*) constituents. Aliquots of the fractions containing 50  $\mu$ g of protein were subjected to SDS-PAGE, and immunoblotting was performed using antibodies reactive against the c-myc epitope (PLC $\gamma$ ) and G $\beta_{1-4}$  (G $\beta$ ) as a marker for the particulate fraction containing plasma membranes of transfected cells.



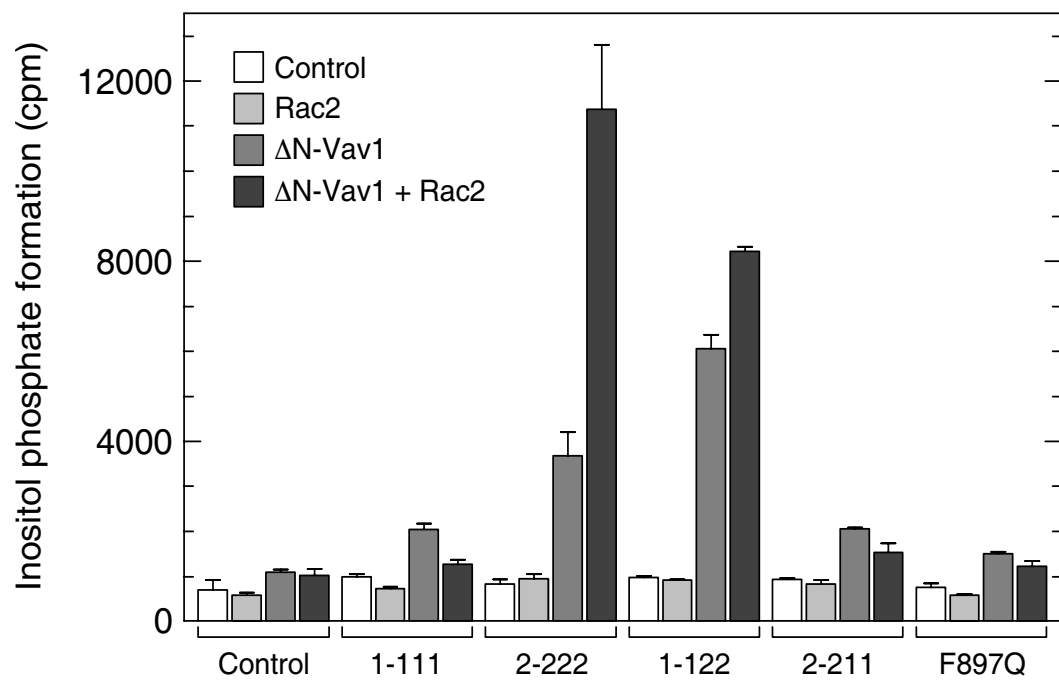

**Figure S1**



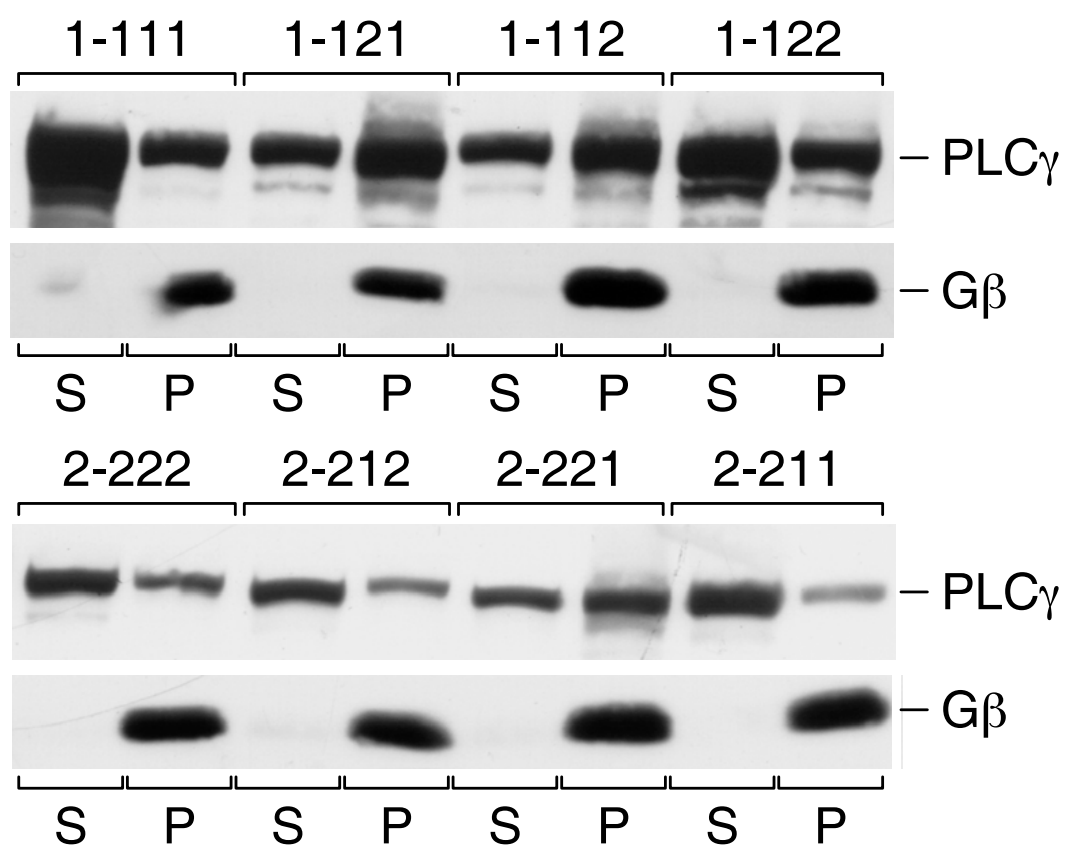

**Figure S2**
